# Supplementary material
Source: PubMed Central journal article supplement (PMC5001914)
Supplement: NIHMS800532-supplement-Supplemental_figure_and_table.pdf [file NIHMS800532-supplement-Supplemental_figure_and_table.pdf]

SUPPLEMENTAL MATERIAL

Supplemental Figure I. Funnel Plots Assessing for Publication Bias in Publications on Gallstone Disease and Risk of Coronary Heart Disease.

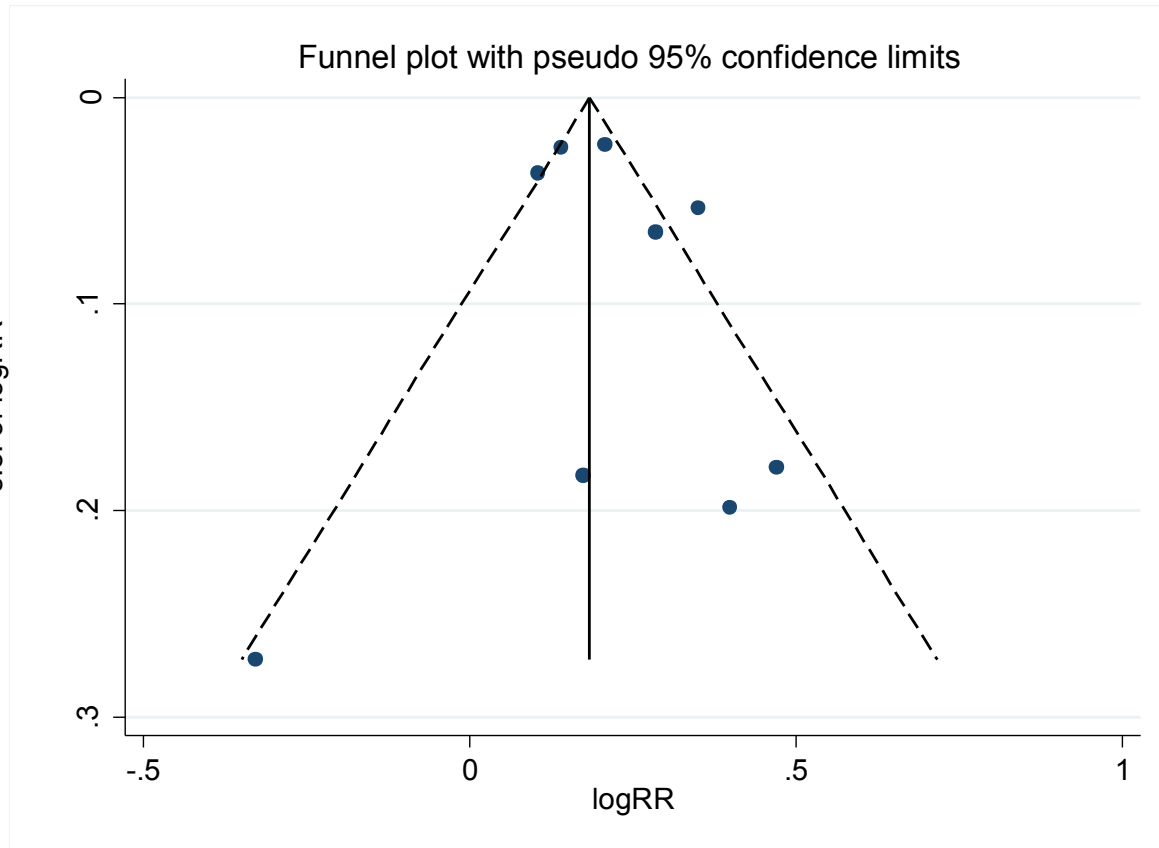

**Supplemental Table I.** Cohort studies of gallstone disease and risk of coronary heart disease from previous studies and our 3 cohorts

| Citation (y)                    | Study population                                       | Sample size, n                     | Baseline age (y) | Follow-up (y)  | Participants with gallstone disease           | CHD cases                                                                              | Adjustment for potential confounders                                                                                                                                                      | Relative risk (95% CI)                               |
|---------------------------------|--------------------------------------------------------|------------------------------------|------------------|----------------|-----------------------------------------------|----------------------------------------------------------------------------------------|-------------------------------------------------------------------------------------------------------------------------------------------------------------------------------------------|------------------------------------------------------|
| Bortnichak *, 1984 <sup>1</sup> | Framingham Heart Study original cohort                 | 4,647 (males: 2171, females: 2476) | 28–62            | Up to 26       | 421 (diagnosed cholesterol gallstone disease) | 699 (myocardial infarction, sudden death, coronary insufficiency, and angina pectoris) | Age, gender, overweight, left ventricular hypertrophy, smoking, systolic blood pressure, diabetes, serum cholesterol, and length of follow-up                                             | Males: 1.60 (1.13–2.28)<br>Females: 0.72 (0.42–1.22) |
| Olaiya, 2013 <sup>2</sup>       | The Taiwan National Health Insurance Research Database | 34,905                             | 18–80            | 6              | 6,981 (diagnosed)                             | Not known (3,693 including stroke, CHD and heart failure cases)                        | Age, gender, peripheral vascular disease, chronic obstructive pulmonary disease, hypertension, diabetes, hyperlipidemia, alcoholism, chronic liver disease, and anemia                    | 1.42 (1.28–1.58) (this estimate was for CHD only)    |
| Wirth, 2013 <sup>3</sup>        | EPIC–Potsdam                                           | 24,422                             | 35–65            | On average 8.2 | 3,178 (self-reported)                         | 243 (myocardial infarction)                                                            | Age, gender, education, physical activity, smoking, alcohol intake, BMI, waist circumference, hypertension and hyperlipidemia                                                             | 1.19 (0.83–1.70)                                     |
|                                 | EPIC–Heidelberg                                        | 22,064                             |                  |                | 1,650 (self-reported)                         | 264 (myocardial infarction)                                                            |                                                                                                                                                                                           | 1.49 (1.01–2.20)                                     |
| Lv, 2015 <sup>4</sup>           | China Kadoorie Biobank study                           | 487,373                            | 30–79            | 7.2 (median)   | 28,345 (self-reported)                        | 24,959 (ischemic heart disease)                                                        | Age, gender, education, level of education; marital status; alcohol consumption; smoking; physical activity; intake of red meat, fresh fruits, and vegetables; prevalent hypertension and | 1.23 (1.17–1.28)                                     |

|                        |                                      |         |       |          |                                                       |                                                       |                                                                                                                                                                                                                                                                                                                    |                  |
|------------------------|--------------------------------------|---------|-------|----------|-------------------------------------------------------|-------------------------------------------------------|--------------------------------------------------------------------------------------------------------------------------------------------------------------------------------------------------------------------------------------------------------------------------------------------------------------------|------------------|
|                        |                                      |         |       |          |                                                       |                                                       | diabetes; family history of heart attack; menopausal status (for women only), and BMI                                                                                                                                                                                                                              |                  |
| Zheng, (present study) | Nurses' Health Study                 | 112,520 | 30–55 | Up to 30 | 8,796 (self-reported with high validity) <sup>5</sup> | 10,923 (myocardial infarction, and revascularization) | Age, BMI, myocardial infarction family history, smoking, alcohol intake, daily cholesterol intake, daily energy intake, physical activity, race, marital status, post-menopausal hormone replacement, Alternative Health Eating Index Score, hypercholesterolemia, hypertension, diabetes, and regular aspirin use | 1.15 (1.10–1.21) |
| Zheng, (present study) | Nurses' Health Study II              | 112,919 | 25–42 | Up to 22 | 5,227 (self-reported with high validity) <sup>5</sup> | 1,397 (myocardial infarction, and revascularization)  |                                                                                                                                                                                                                                                                                                                    | 1.33 (1.17–1.51) |
| Zheng, (present study) | Health Professionals Follow-up Study | 43,703  | 40–75 | Up to 24 | 1,449 (self-reported with high validity) <sup>5</sup> | 8,945 (myocardial infarction, and revascularization)  |                                                                                                                                                                                                                                                                                                                    | 1.11 (1.04–1.20) |

\*: this study excluded the participants with baseline prevalent gallstone disease, this study presented odds ratio as the final result, and we used a statistical method to convert odds ratio to relative risk approximately.<sup>6,7</sup>

**Supplemental References:**

1. Bortnichak EA, Freeman DH, Jr., Ostfeld AM, Castelli WP, Kannel WB, Feinleib M, McNamara PM. The association between cholesterol cholelithiasis and coronary heart disease in framingham, massachusetts. *Am J Epidemiol.* 1985;121:19-30
2. Olaiya MT, Chiou HY, Jeng JS, Lien LM, Hsieh FI. Significantly increased risk of cardiovascular disease among patients with gallstone disease: A population-based cohort study. *PLoS One.* 2013;8
3. Wirth J, Giuseppe RD, Wientzek A, Katzke VA, Kloss M, Kaaks R, Boeing H, Weikert C. Presence of gallstones and the risk of cardiovascular diseases: The epic-germany cohort study. *Eur J Prev Cardiol.* 2015;22:326-334
4. Lv J, Qi L, Yu C, Guo Y, Bian Z, Chen Y, Yang L, Shen J, Wang S, Li M, Liu Y, Zhang L, Chen J, Chen Z, Li L. Gallstone disease and the risk of ischemic heart disease. *Arterioscler Thromb Vasc Biol.* 2015;35:2232-2237
5. Leitzmann MF WW, Rimm EB, Stampfer MJ, Spiegelman D, Colditz GA, Giovannucci E. A prospective study of coffee consumption and the risk of symptomatic gallstone disease in men. *JAMA.* 1999;281:2106-2112
6. Zhang J, Yu KF. What's the relative risk? A method of correcting the odds ratio in cohort studies of common outcomes. *JAMA.* 1998;280:1690-1691
7. Wang Z. Converting odds ratio to relative risk in cohort studies with partial data information. *J Stat Softw.* 2013;55
