# Supplementary material
Source: PubMed Central journal article supplement (PMC5001914)

## History of gallstone disease and risk of coronary heart disease

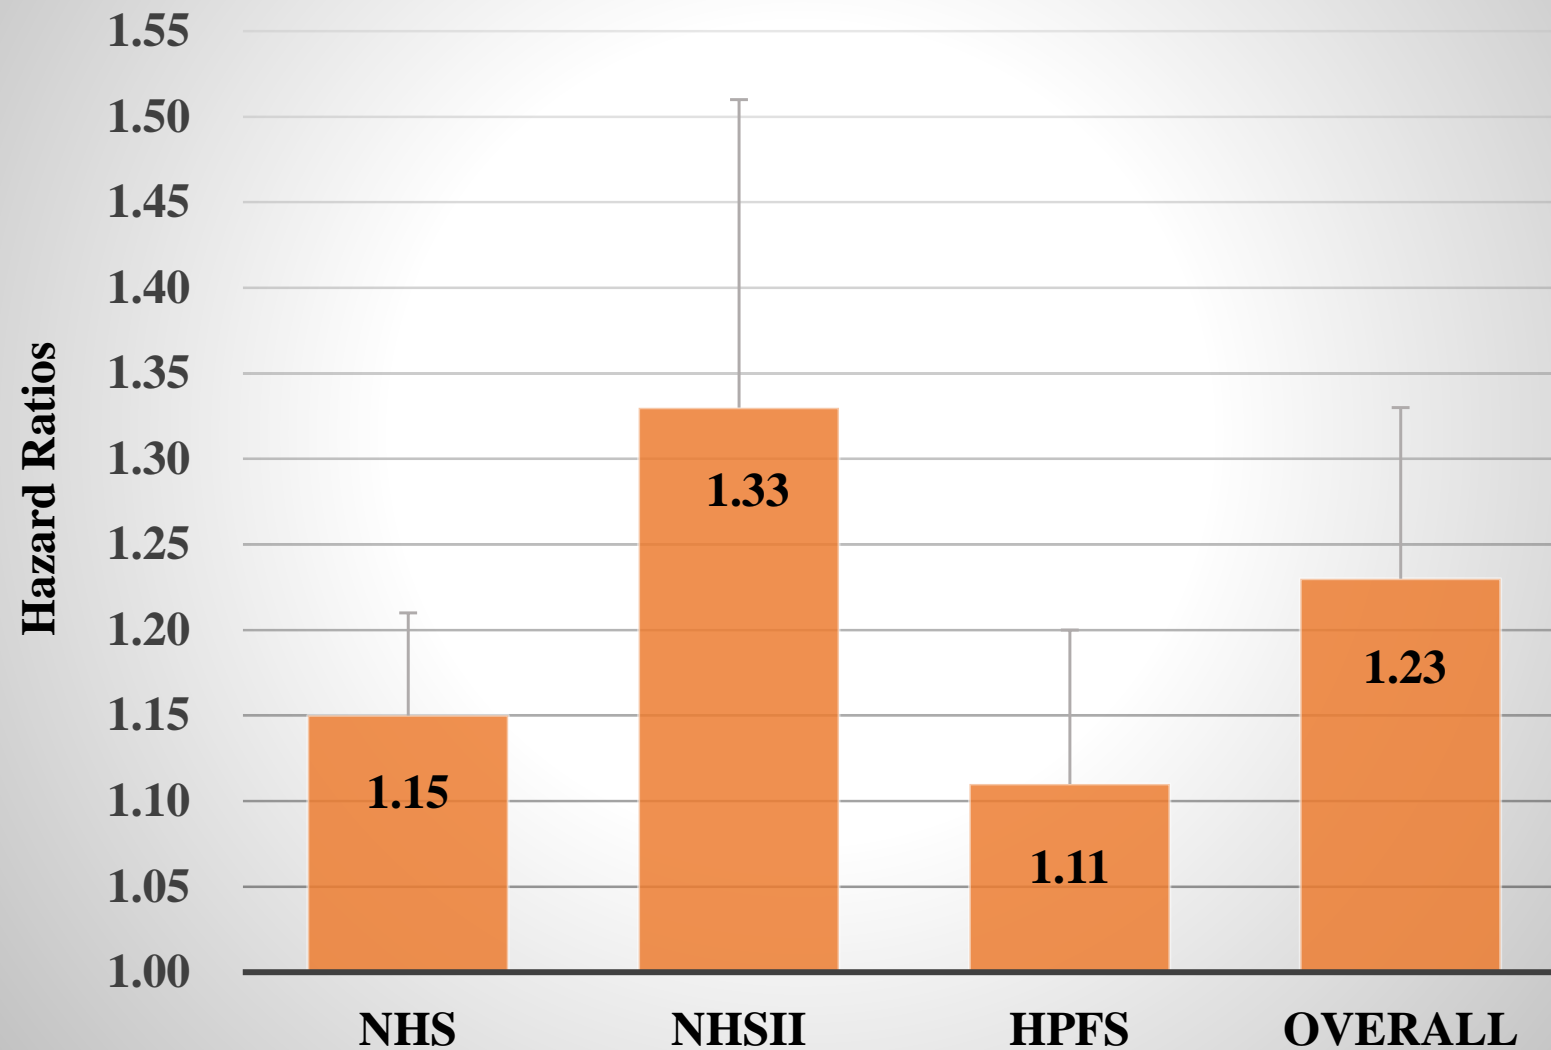

Supplement: NIHMS800532-supplement-graphical_abstract.pdf [file NIHMS800532-supplement-graphical_abstract.pdf]
